# Supplementary material
Source: PubMed Central journal article supplement (PMC4136765)
Supplement: NIHMS612496-supplement-Supplemental.pdf [file NIHMS612496-supplement-Supplemental.pdf]

## Supplementary Data: Figures S1-S5

### Thermally Responsive Nanoparticle-Encapsulated Curcumin and Its Combination with Mild Hyperthermia for Enhanced Cancer Cell Destruction

*Wei Rao,<sup>a,b</sup> Wujie Zhang,<sup>f</sup> Izmarie Poventud-Fuentes,<sup>g</sup> Yongchen Wang,<sup>a,b</sup> Yifeng Lei,<sup>a,b</sup> Pranay Agarwal,<sup>a,b</sup> Benjamin Weekes,<sup>a</sup> Chenglong Li,<sup>d</sup> Xiongbin Lu,<sup>h</sup> Jianhua Yu,<sup>c,e</sup> and Xiaoming He<sup>a,b,c,\*</sup>*

<sup>a</sup>Department of Biomedical Engineering, <sup>b</sup>Davis Heart and Lung Research Institute, <sup>c</sup>James Comprehensive Cancer Center, <sup>d</sup>Division of Medicinal Chemistry and Pharmacognosy, and <sup>e</sup>Division of Hematology, The Ohio State University, Columbus, OH 43210, USA

<sup>f</sup>Biomolecular Engineering Program, Department of Physics and Chemistry, Milwaukee School of Engineering, Milwaukee, WI 53202, USA

<sup>g</sup>Department of Industrial Biotechnology, University of Puerto Rico, Mayaguez, PR 00681, USA

<sup>h</sup>Department of Cancer Biology, University of Texas M.D. Anderson Cancer Center, Houston, TX 77030, USA

\*Correspondence should be addressed to:  
Department of Biomedical Engineering  
The Ohio State University  
1080 Carmack Road, Columbus, OH  
Phone: 1 (614) 247-8759  
Fax: 1 (614) 292-7301  
Email: [he.429@osu.edu](mailto:he.429@osu.edu)

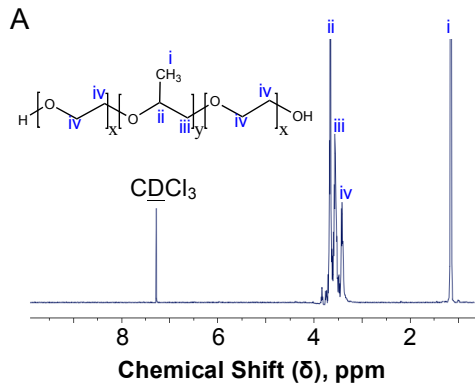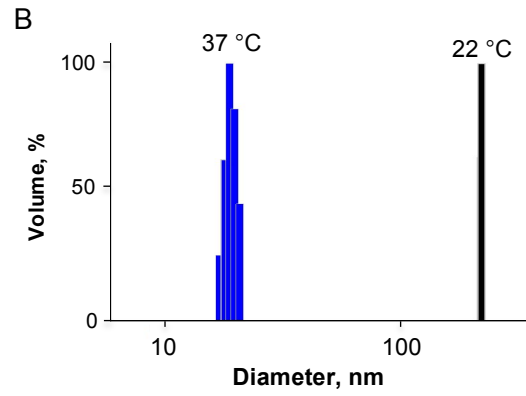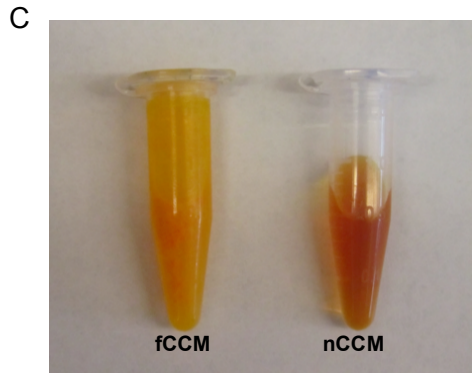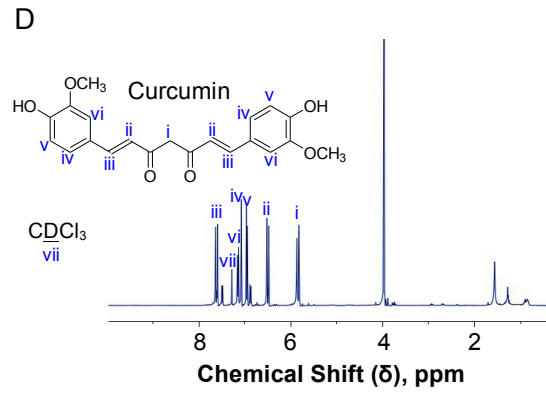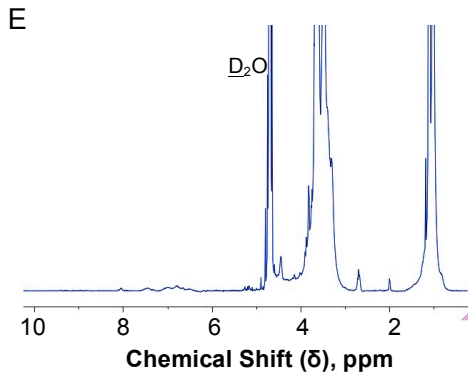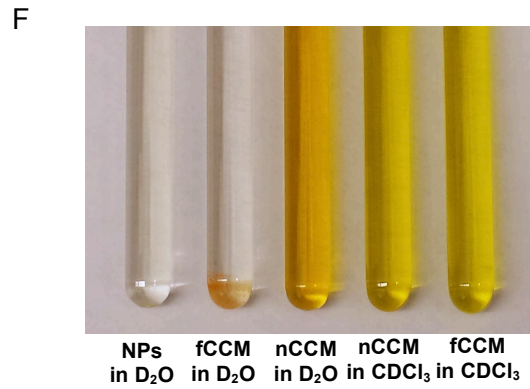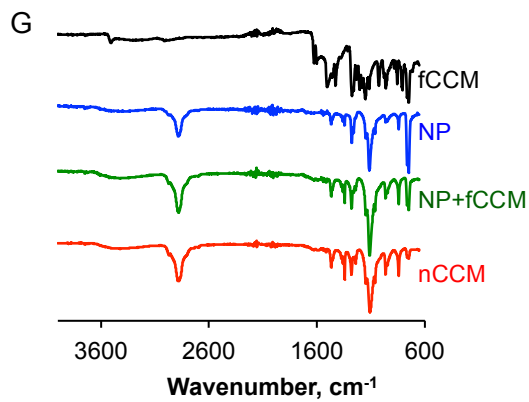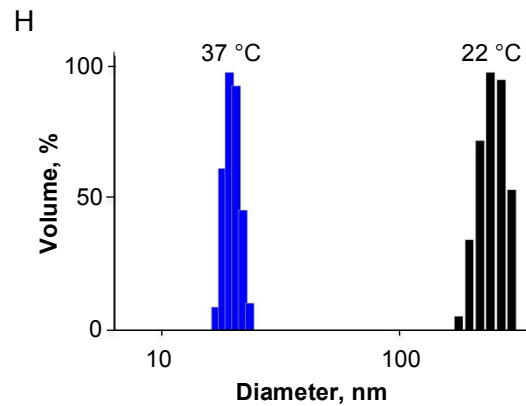

**Figure S1.** Characterization of nanoparticle (NP) and nanoparticle encapsulated-curcumin (nCCM): (A),  $^1\text{H}$  NMR spectrum of Pluronic F127 in deuterated chloroform ( $\text{CDCl}_3$ ); (B), typical dynamic light scattering (DLS) peaks of Pluronic F127-chitosan nanoparticles; (C), typical image showing aggregate formation of free curcumin (fCCM, 1 mg/ml) in water due to its poor aqueous solubility and clear aqueous solution of nCCM (1 mg/ml); (D),  $^1\text{H}$  NMR spectrum showing characteristic peaks (i-vi) of fCCM; (E),  $^1\text{H}$  NMR spectrum of nCCM in deuterated water ( $\text{D}_2\text{O}$ ) showing that only tiny peaks ( $\delta$ : 5.5~8) characteristic of curcumin are observable probably because the curcumin content was dominantly entrapped in the nanoparticles rather than dissolved directly in  $\text{D}_2\text{O}$ ; (F), a picture showing 5 mg/ml empty nanoparticles (NPs) dissolved in  $\text{D}_2\text{O}$  with a clear appearance, fCCM (0.17 mg/ml) in  $\text{D}_2\text{O}$  with visible aggregates sunk down at the bottom of the tube, nCCM (0.17 mg/ml encapsulated in 5 mg/ml nanoparticles) dissolved in  $\text{D}_2\text{O}$  with homogeneous brownish appearance, nCCM (0.17 mg/ml, encapsulated in 5 mg/ml nanoparticles before dissolving) dissolved in  $\text{CDCl}_3$  with homogeneous yellowish appearance, and fCCM (0.17 mg/ml) dissolved in  $\text{CDCl}_3$  with homogeneous yellowish appearance; (G), whole FTIR spectra of fCCM, NP, simple mixture of NP and fCCM (NP+fCCM), and nCCM; and (H), typical DLS data of thermally responsive nCCM obtained with 1:60 feeding ratio of free curcumin to nanoparticles.

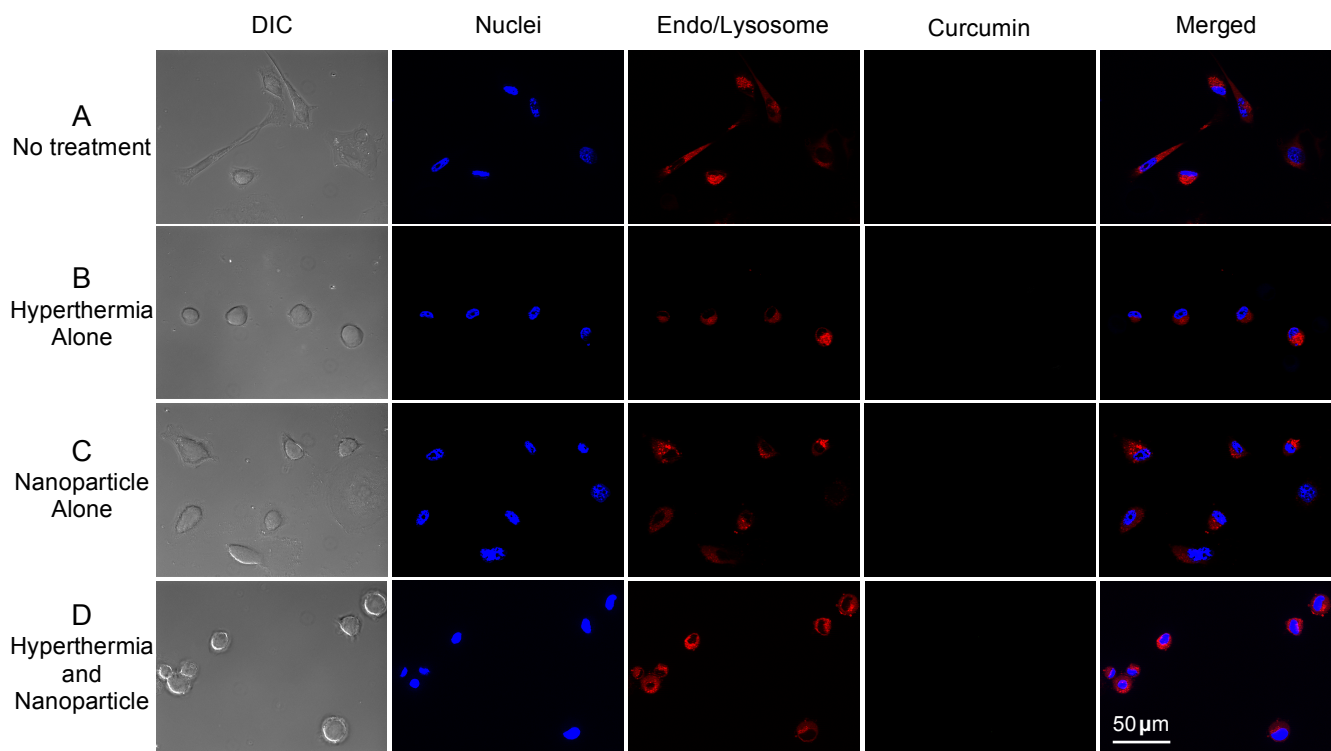

**Figure S2.** Typical Apotome structured illumination microscopy (SIM) fluorescence images of PC-3 cancer cells: (A) with no treatment, (B) with hyperthermia treatment alone by heating at 43 °C for 30 min, (C) after incubating with empty nanoparticles for 1.5 h, and (D) after incubating with empty nanoparticles for 1.5 h and hyperthermia at 43 °C from 1-1.5 h: the nuclei and lyso/endosomes were stained using Hoechst and LysoTracker Red, respectively; the empty nanoparticle concentration is the highest one (1.845 mg/ml) used in this study; and no clear curcumin fluorescence is observable for all the conditions.

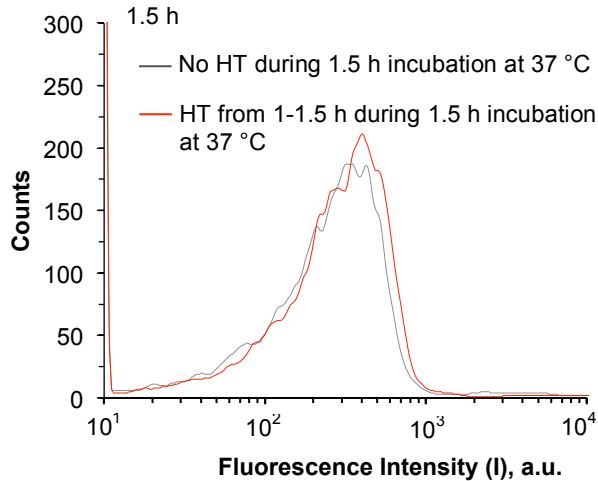

**Figure S3.** Typical flow cytometry peaks of fluorescence intensity in PC-3 cancer cells showing their uptake of free curcumin (fCCM) either with or without mild hyperthermia (HT) at 43 °C applied between 1 and 1.5 h. The PC-3 cells were treated with 10  $\mu\text{g/ml}$  fCCM for 1 h, then the cells without HT were continued to incubate with fCCM for 0.5 h while cells with HT were heated at 43 °C for 0.5 h. The cells in both groups were then collected and detected for fluorescence at 530/30 nm (excited at 488 nm) using a BD LSR-II Flow Cytometer. The mean curcumin intensity ( $I-I_0$ ) calculated as the difference in mean fluorescence intensity of cells before ( $I_0$ ) and after ( $I$ ) curcumin treatment, was  $200.7 \pm 10.4$  and  $236.3 \pm 24.4$  for fCCM treatment without and with HT, respectively. These data are consistent with the microscopy data shown in Figure 5A and B. Both values are much lower than the corresponding values for nCCM at 1.5 h showing in Fig. 4 ( $1732.4 \pm 87.4$  and  $1453.7 \pm 208.0$  for without and with HT, respectively). The data are reported as the mean  $\pm$  standard error of mean of data from three independent runs.

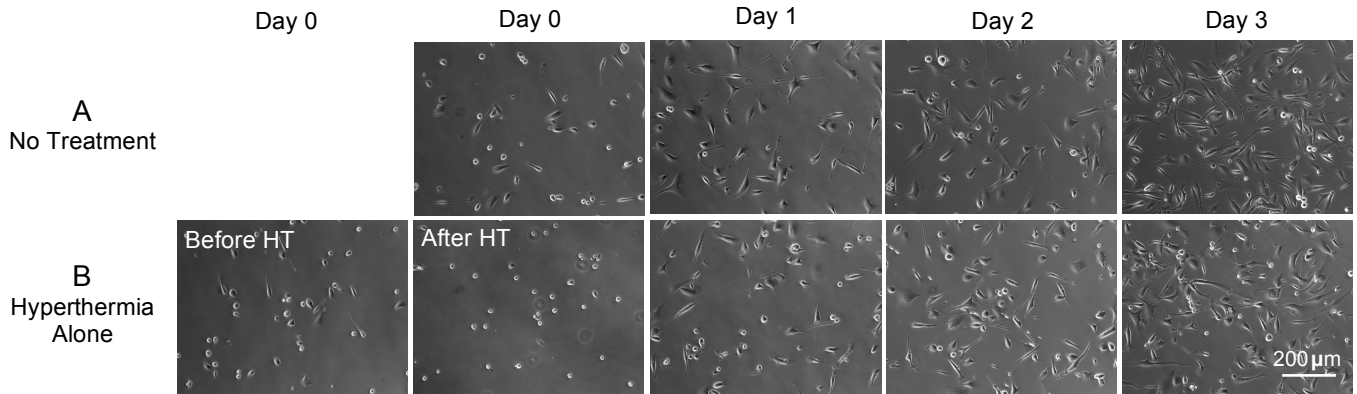

**Figure S4.** Typical phase contrast micrographs showing the morphology and proliferation of PC-3 cancer cells with (A) no treatment and (B) hyperthermia (HT) treatment alone by heating at 43 °C for 30 min: the cell became rounded temporarily after hyperthermia, which didn't affect the cell proliferation at all in the subsequent days.

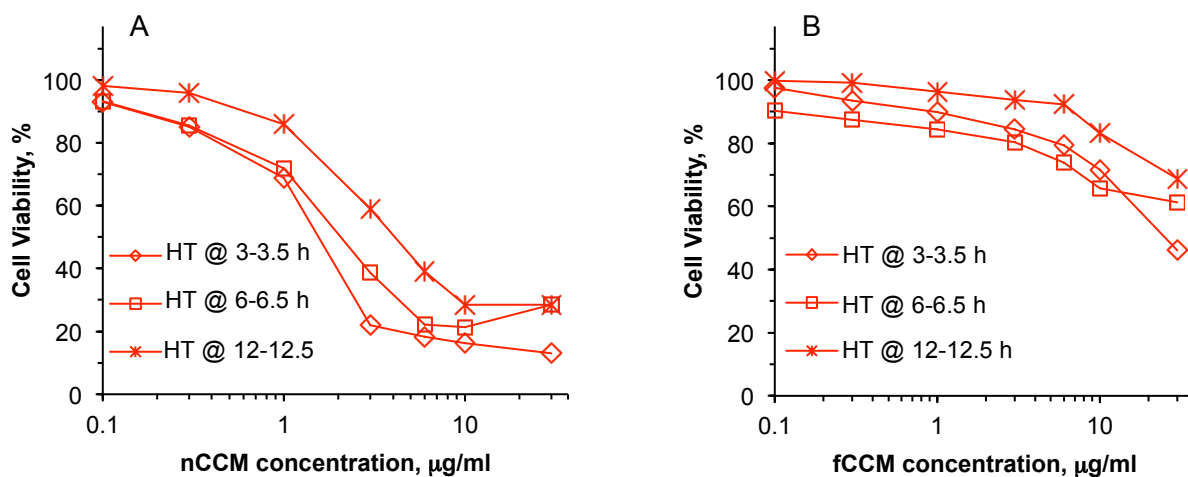

**Figure S5.** Viability of PC-3 cancer cells after 3-day incubation with: (A),  $\sim 22$  nm nanoparticle-encapsulated curcumin (nCCM) and (B), free curcumin (fCCM) of various concentrations with mild hyperthermia (HT) applied from 3-3.5, 6-6.5, and 12-12.5 h during the incubation. The data are the average of three independent runs. Error bars were omitted for clarity, but the standard error of mean for all the data is within  $\sim 20\%$  of the average.
